# Supplementary material for: Optimization of the Biosynthesis of B-Ring Ortho-Hydroxy Lated Flavonoids Using the 4-Hydroxyphenylacetate 3-Hydroxylase Complex (HpaBC) of Escherichia coli
Source: Molecules. 2021 May 14;26(10):2919. doi: 10.3390/molecules26102919 (PMC8156182; doi:10.3390/molecules26102919)
Supplement: Supplementary file 1 [file molecules-26-02919-s001.zip › molecules-1181992-supplementary.pdf]

Supplement 1

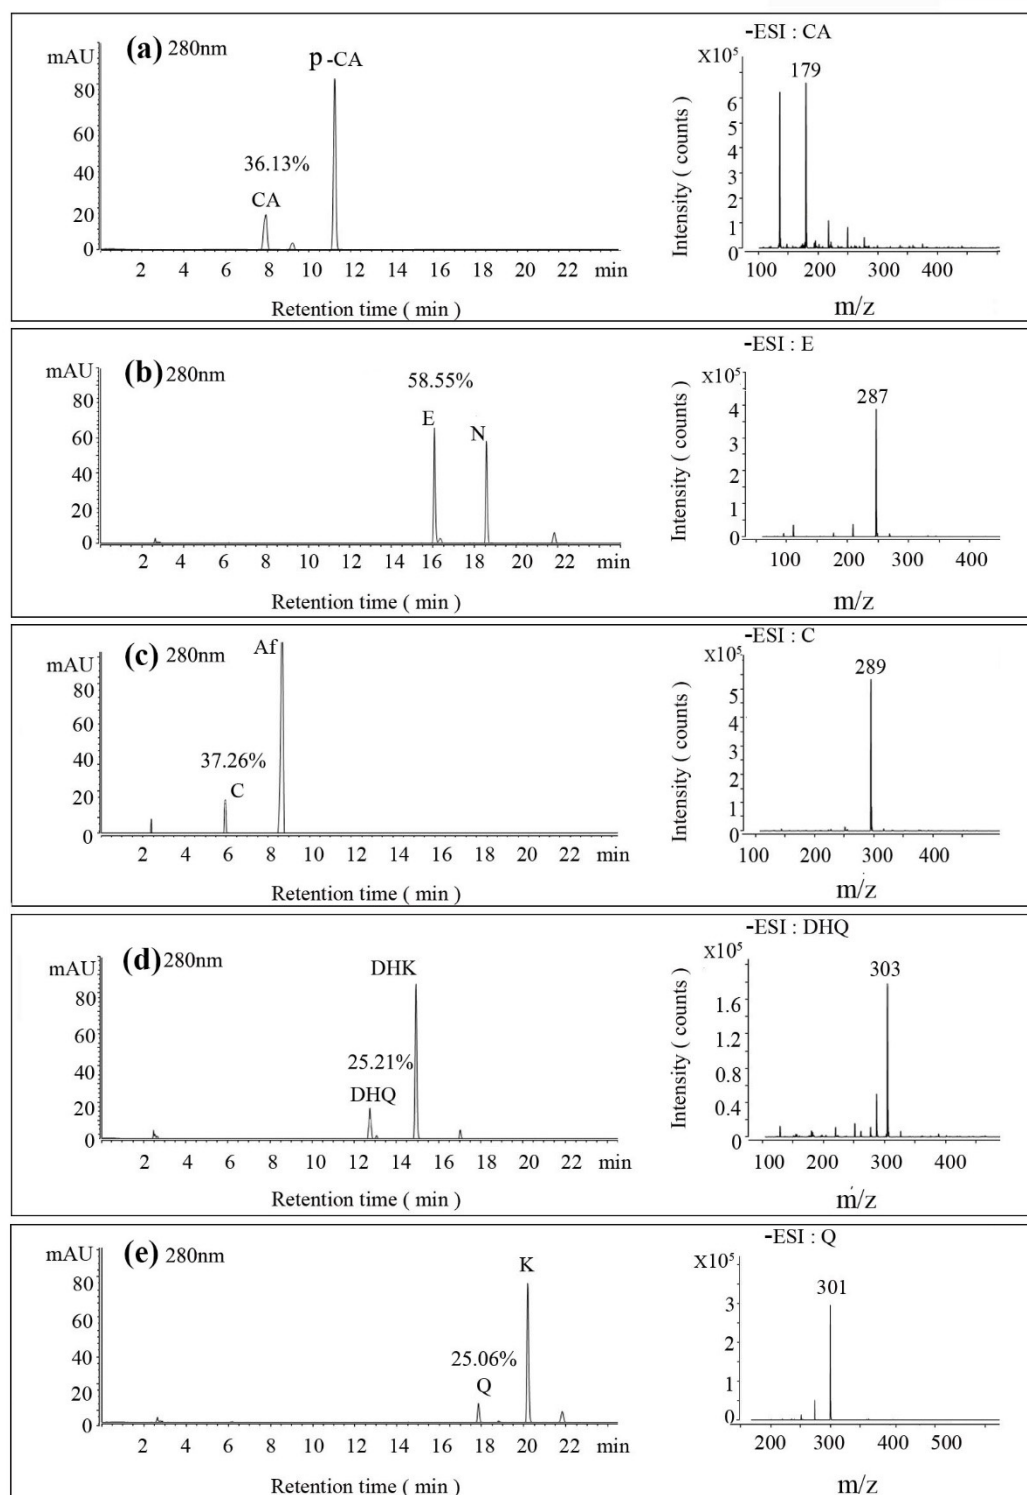

Figure S1 HPLC and HPLC-MS/MS analysis of the enzymatic products of the HpaBC complex, when feeding with different substrates. HPLC chromatogram (left) and MS/MS (right) analyses of the enzymatic reaction. N, E, K, Q, DHK, DHQ, C, Af were monitored at 280 nm, and p-CA and CA were monitored at 340 nm. The substrates and corresponding products

were detected by HPLC and LC-MS. The ortho-hydroxylation activities of (a): p-CA to CA; (b): N to E; (c): Af to C; (d): K to Q; and (e): DHK to DHQ. Final substrate concentration of 200 mg·L<sup>-1</sup>, n=3

**Table S1** Primers of *HpaB* and *HpaC* for construction of recombinant expression plasmids

| Primer name                                 | Primer sequence (5'-3')                                                                              | Length of<br>PCR product (bp) |
|---------------------------------------------|------------------------------------------------------------------------------------------------------|-------------------------------|
| HpaB-MCS-1<br>( <i>Bam</i> HI)              | F: ACCATCATCACACAGCCAGGATCCGATGAAACCAGAAGATTTCGG<br>R: GGCGCGCCGAGCTCGAATTCGGATCCTTTCAGCAGCTTATCCAG  | 1,612                         |
| HpaC-MCS-1<br>( <i>Bam</i> HI)              | F: ACCATCATCACACAGCCAGGATCCGATGCAATTAGATGAACAACGC<br>R: GGCGCGCCGAGCTCGAATTCGGATCCAATCGCAGCTTCCATTTC | 562                           |
| HpaB-MCS-2<br>( <i>Nde</i> I, <i>Xho</i> I) | F: GGAATTCCATATGAAACCAGAAGATTTCCGCGCC<br>R: TTACCGCTCGAGTTTCAGCAGCTTATCCAGC                          | 1,582                         |
| HpaC-MCS-2<br>( <i>Nde</i> I, <i>Xho</i> I) | F: GGAATTCCATATGCAATTAGATGAACAACGCCTG<br>R: TTACCGCTCGAGAATCGCAGCTTCCATTTCAG                         | 532                           |
